# Supplementary material for: Mechanistic insights into the impact of Cold Atmospheric Pressure Plasma on human epithelial cell lines
Source: PubMed Central journal article supplement (PMC5264585; doi:10.1038/srep41163), 2017-01-25
Supplement: srep41163-s1.pdf [file srep41163-s1.pdf]

**Mechanistic insights into the impact of Cold Atmospheric Pressure Plasma  
on human epithelial cell lines**

Marlène Dezest<sup>a</sup>, Laurent Chavatte<sup>a</sup>, Marion Bourdens<sup>b</sup>, Damien Quinton<sup>c</sup>, Mylène Camus<sup>d</sup>,  
Luc Garrigues<sup>d</sup>, Pascal Descargues<sup>e</sup>, Stéphane Arbault<sup>c</sup>, Odile Burlet-Schiltz<sup>d</sup>, Louis Casteilla

<sup>b</sup> Franck Clément<sup>a</sup>, Valérie Planat<sup>b&</sup> and Anne-Laure Bulteau<sup>a&\*</sup>

## **Supplementary Methods**

### **Determination of cytosolic glutathione levels (GSH)**

Glutathione levels were determined using Thiol tracker violet detection reagent ((Thermofischer, Saint Aubin, France) and analyzed using a microplate fluorimetric reader (BMG-FLUOstar Galaxy, Stuttgart, Germany), excitation/emission wavelengths were 405/526 nm.

### **Assay for aconitase activity**

Mitochondria were isolated as previously described<sup>25</sup>. Mitochondria were suspended in 25 mM phosphate buffer pH 7.25 supplemented with 0.05% Triton X-100 and aconitase activity was assayed spectrophotometrically at 340 nm, as previously described<sup>26</sup>.

### **Assay for KGDH**

Mitochondria were diluted in 25 mM MOPS, 0.05% Triton X-100, pH 7.4, and KGDH activity was assayed spectrophotometrically as the rate of NAD<sup>+</sup> reduction to NADH as previously described<sup>27</sup>.

## **Supplementary Figure Legends**

### **Fig. S1. Antioxidant response following plasma treatment.**

A. Measurement of reduced glutathione levels. HaCaT, SK-MEL-28 and HCT-116 cells were exposed to plasma treatment (He, He-O<sub>2</sub> and He-N<sub>2</sub>) for 5 min with 1 hr post-treatment

storage. 24 hr after plasma treatment they were incubated with ThiolTracker™ Violet dye for 30 min and GSH level was assayed using a microplate fluorimetric reader. GSH level is presented as a percent of non-treated cells. Data, mean  $\pm$  SEM from three independent cultures,\*  $P < 0.05$ ; B. NRF2 induction following plasma treatment. HaCaT and HCT-116 cells were exposed to plasma treatment (He, He-O<sub>2</sub> and He-N<sub>2</sub>) for 5 min with 1 hr post-treatment storage. 24 hr after plasma treatment, NRF2 expression was detected by immunoblotting against NRF2 protein using whole-cell lysates ( $n = 3$ ). C. Actin was used as loading control for quantification. D. Removal of extracellular H<sub>2</sub>O<sub>2</sub> by cells is a first-order process. HaCaT cells were grown in normal or medium supplemented in Selenium (Se), a condition which is known to increase glutathione peroxidase activity, and exposed to plasma treatment (He, He-O<sub>2</sub> and He-N<sub>2</sub>) for 5 min and then assayed for the remaining extracellular H<sub>2</sub>O<sub>2</sub> by cyclic voltammetry or Amplex red assays. The observed first-order rate constant for the loss of extracellular H<sub>2</sub>O<sub>2</sub> in this experiment was determined to be  $k_{obs} = 0.31 \text{ min}^{-1}$  for He-plasma,  $k_{obs} = 0.28 \text{ min}^{-1}$  for He-N<sub>2</sub> plasma,  $k_{obs} = 1.04 \text{ min}^{-1}$  He-O<sub>2</sub> plasma and  $k_{obs} = 0.72 \text{ min}^{-1}$  for HaCaT cell supplemented with selenium and treated with He-plasma. HCT-116 and SK-MEL-28 cells were grown in normal medium and exposed to He plasma treatment and then assayed for the remaining extracellular H<sub>2</sub>O<sub>2</sub> by Amplex red assays. The observed first-order rate constant for the loss of extracellular H<sub>2</sub>O<sub>2</sub> in this experiment was determined to be  $k_{obs} = 0.78 \text{ min}^{-1}$  for HCT-116 cells and  $k_{obs} = 1.08 \text{ min}^{-1}$  for SK-MEL-28 cells.

**Fig. S2. Effect of plasma treatment on activity of key metabolic enzymes in HaCaT cells.**

A. HaCaT cells were exposed to PAL for 1 hr (PBS treated for 5 min by He, He-O<sub>2</sub> and He-N<sub>2</sub> plasmas). Mitochondria were prepared 24hr after plasma treatment and aconitase activity was assayed. B. For the same CAPP treatment, mitochondria were prepared 24 hr plasma

treatment and  $\alpha$  ketoglutarate activity was assayed. Data, mean  $\pm$  SEM from three independent cultures, \* P < 0.05; \*\* P < 0.01.

**Table S1.** List of proteins of varying abundances after the different plasma treatments (helium, He; helium/nitrogen, N; helium/oxygen, O) in comparison with control HaCaT cells (C)

**Table S2.** List of proteins affected by the plasma activated treatments in HaCaT cells comparison with control cells.

# Supplementary Figure 1

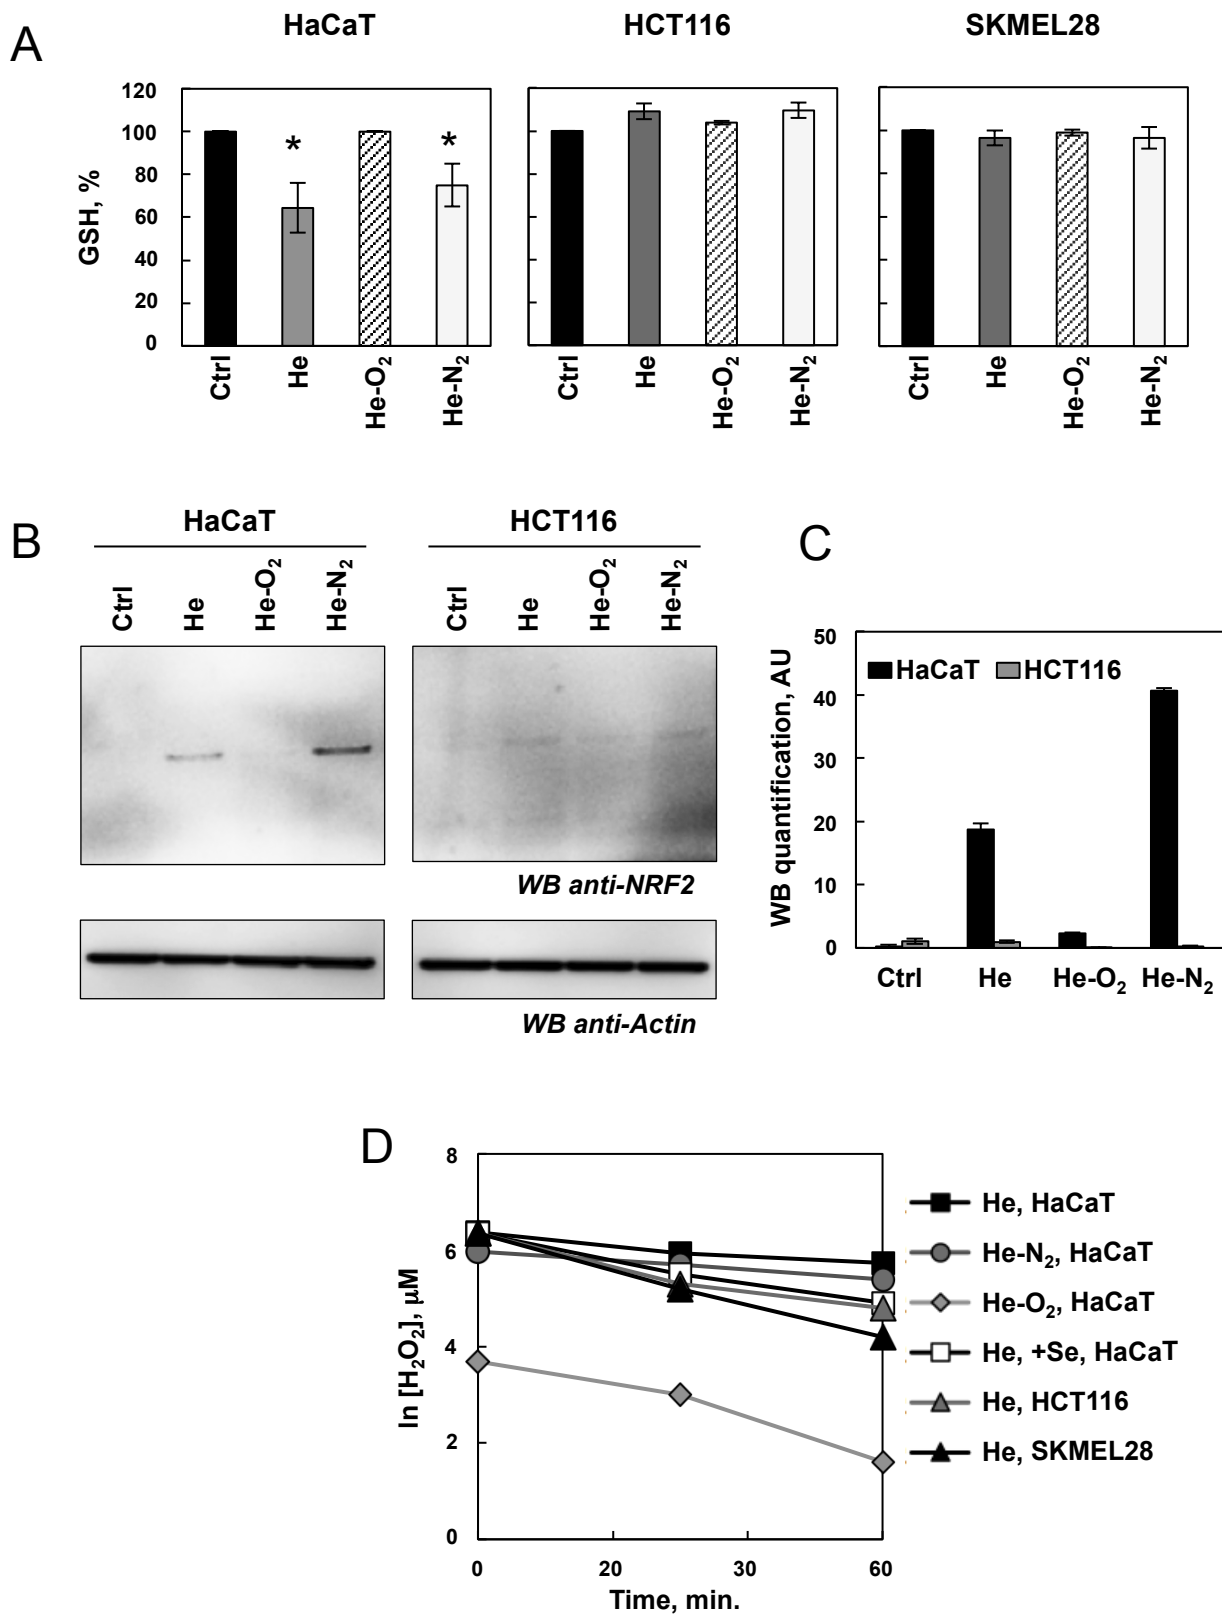

## Supplementary Figure 2

A

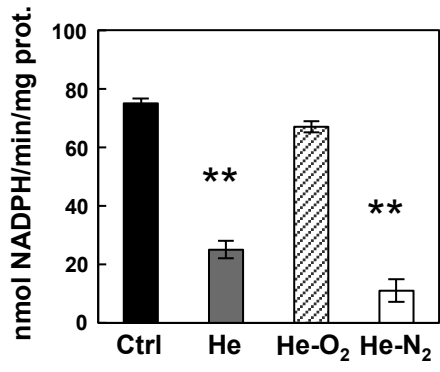

B

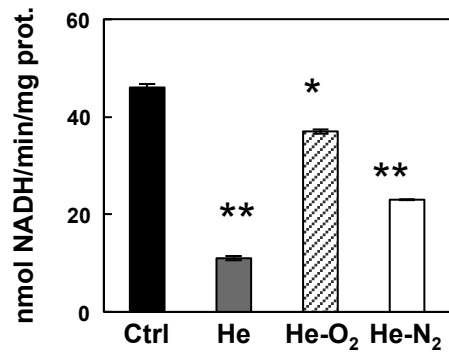

Table S1. List of proteins altered by the different plasma treatments (helium, He; helium/nitrogen, N; helium/oxygen, O) in comparison to control HaCaT cells (C)

| Gene names                                                | Acc n° | Name                                                        | Ratio N/C | p value | Ratio He/C | p value | Ratio O2/C | p value |
|-----------------------------------------------------------|--------|-------------------------------------------------------------|-----------|---------|------------|---------|------------|---------|
| <b>Up and down-regulated in three plasma treatments</b>   |        |                                                             |           |         |            |         |            |         |
| AARS2                                                     | Q5J7Z9 | Alanine-tRNA ligase, mitochondrial                          | 1334.94   | 0,0000  | 1299,55    | 0,0000  | 885,55     | 0,0001  |
| SUPT6H                                                    | Q7KZ85 | Transcription elongation factor SPT6                        | 14,67     | 0,0000  | 17,70      | 0,0002  | 14,90      | 0,0002  |
| KRT1                                                      | P04264 | Keratin, type II cytoskeletal 1                             | 11,23     | 0,0050  | 4,26       | 0,0008  | 3,00       | 0,0023  |
| PLAUR                                                     | Q03405 | Urokinase plasminogen activator surface receptor            | 9,75      | 0,0000  | 12,19      | 0,0004  | 5,34       | 0,0011  |
| DDX54                                                     | Q8TDD1 | ATP-dependent RNA helicase DDX54                            | 3,45      | 0,0039  | 4,39       | 0,0017  | 0,20       | 0,0013  |
| ASPH                                                      | Q12797 | Aspartyl/asparaginyl beta-hydroxylase                       | 2,21      | 0,0016  | 2,54       | 0,0065  | 2,12       | 0,0062  |
| OAS2                                                      | P29728 | 2-5-oligoadenylate synthase 2                               | 0,28      | 0,0006  | 0,37       | 0,0041  | 0,47       | 0,0094  |
| <b>Up and down-regulated in two plasma treatments</b>     |        |                                                             |           |         |            |         |            |         |
| CHD4                                                      | Q14839 | Chromodomain-helicase-DNA-binding protein 4                 | 111,08    | 0,0001  | 118,18     | 0,0001  |            |         |
| POMP                                                      | Q9Y244 | Proteasome maturation protein                               | 29,85     | 0,0002  | 29,78      | 0,0002  |            |         |
| TP53BP1                                                   | Q12888 | Tumor suppressor p53-binding protein 1                      | 27,27     | 0,0000  | 23,30      | 0,0000  |            |         |
| MKI67                                                     | P46013 | Antigen KI-67                                               | 21,77     | 0,0007  | 22,59      | 0,0009  |            |         |
| FLNB                                                      | O75369 | Filamin-B                                                   | 19,15     | 0,0000  | 19,61      | 0,0000  |            |         |
| TPR                                                       | P12270 | Nucleoprotein TPR                                           | 15,95     | 0,0001  | 18,24      | 0,0001  |            |         |
| FILNA                                                     | P21333 | Filamin-A                                                   | 14,60     | 0,0001  | 15,73      | 0,0001  |            |         |
| DYNC1H1                                                   | Q14204 | Cytoplasmic dynein 1 heavy chain 1                          | 14,16     | 0,0003  | 14,98      | 0,0003  |            |         |
| F10                                                       | P00742 | Coagulation factor X                                        | 12,73     | 0,0001  | 21,30      | 0,0000  |            |         |
| PRKDC                                                     | P78527 | DNA-dependent protein kinase catalytic subunit              | 12,72     | 0,0002  | 12,22      | 0,0003  |            |         |
| C6                                                        | P13671 | Complement component C6                                     | 12,21     | 0,0002  | 19,78      | 0,0001  |            |         |
| HLA-C                                                     | P04222 | HLA class I histocompatibility antigen, Cw-3 alpha chain    | 11,27     | 0,0000  |            |         | 12,08      | 0,0000  |
| DIDO1                                                     | Q9BTC0 | Death-inducer obliterator 1                                 | 9,50      | 0,0000  | 9,04       | 0,0001  |            |         |
| PRRC2C                                                    | Q9Y520 | Protein PRRC2C                                              | 9,29      | 0,0002  | 11,06      | 0,0008  |            |         |
| RANBP2                                                    | P49792 | E3 SUMO-protein ligase RanBP2                               | 9,03      | 0,0004  | 10,75      | 0,0005  |            |         |
| LGMN                                                      | Q99538 | Legumain                                                    | 8,41      | 0,0043  | 9,19       | 0,0047  |            |         |
| MDC1                                                      | Q14676 | Mediator of DNA damage checkpoint protein 1                 | 7,57      | 0,0025  | 9,12       | 0,0028  |            |         |
| WDR46                                                     | O15213 | WD repeat-containing protein 46                             | 7,56      | 0,0009  | 5,81       | 0,0005  |            |         |
| PLEC                                                      | Q15149 | Plectin                                                     | 7,42      | 0,0001  | 8,07       | 0,0001  |            |         |
| SPTAN1                                                    | Q13813 | Spectrin alpha chain, non-erythrocytic 1                    | 6,24      | 0,0033  | 5,87       | 0,0040  |            |         |
| SDC4                                                      | P31431 | Syndecan-4                                                  | 6,18      | 0,0013  | 7,11       | 0,0015  |            |         |
| AHCTF1                                                    | Q8WYP5 | Protein ELYS                                                | 6,09      | 0,0001  | 5,14       | 0,0004  |            |         |
| EPPK1                                                     | P58107 | Epiplakin                                                   | 5,81      | 0,0012  | 8,15       | 0,0008  |            |         |
| UBE2O                                                     | Q9C0C9 | Ubiquitin-conjugating enzyme E2 O                           | 5,14      | 0,0054  | 4,10       | 0,0084  |            |         |
| SEC16A                                                    | O15027 | Protein transport protein Sec16A                            | 5,09      | 0,0020  | 4,21       | 0,0078  |            |         |
| TNKS1BP1                                                  | Q9C0C2 | 182 kDa tankyrase-1-binding protein                         | 4,70      | 0,0005  | 4,39       | 0,0007  |            |         |
| SRRM2                                                     | Q9UQ35 | Serine/arginine repetitive matrix protein 2                 | 4,60      | 0,0000  | 8,27       | 0,0002  |            |         |
| TNC                                                       | P24821 | Tenascin                                                    | 4,20      | 0,0020  | 8,35       | 0,0086  |            |         |
| FAM175B                                                   | Q15018 | BRISC complex subunit Abro1                                 | 4,05      | 0,0058  | 3,06       | 0,0001  |            |         |
| MBD2                                                      | Q9UBB5 | Methyl-CpG-binding domain protein 2                         | 3,98      | 0,0030  | 4,36       | 0,0020  |            |         |
| HBA1                                                      | P69905 | Hemoglobin subunit alpha                                    | 3,95      | 0,0021  | 12,17      | 0,0000  |            |         |
| CLDN4/9/6/3                                               | O14493 | Claudin-4/9/6/3                                             | 3,72      | 0,0003  |            |         | 2,92       | 0,0007  |
| GOLM1                                                     | Q8NB34 | Golgi membrane protein 1                                    | 3,65      | 0,0001  | 4,75       | 0,0015  |            |         |
| ECT2                                                      | Q9H8V3 | Protein ECT2                                                | 3,60      | 0,0033  |            |         | 2,93       | 0,0074  |
| CEP170B                                                   | Q9Y4F5 | Centrosomal protein of 170 kDa protein B                    | 3,46      | 0,0097  | 7,16       | 0,0067  |            |         |
| AHNAK                                                     | Q09666 | Neuroblast differentiation-associated protein AHNAK         | 3,43      | 0,0002  | 4,25       | 0,0001  |            |         |
| SLC30A1                                                   | Q9Y6M5 | Zinc transporter 1                                          | 3,21      | 0,0001  | 5,30       | 0,0001  |            |         |
| CHD8/6/9/7                                                | Q9HCK8 | Chromodomain-helicase-DNA-binding protein 8/6/9/7           | 3,03      | 0,0002  | 2,65       | 0,0009  |            |         |
| TCOF1                                                     | Q13428 | Treacle protein                                             | 3,02      | 0,0051  | 3,32       | 0,0021  |            |         |
| MARCKSL1                                                  | P49006 | MARCKS-related protein                                      | 2,77      | 0,0024  | 2,72       | 0,0019  |            |         |
| UBR4                                                      | Q5T4S7 | E3 ubiquitin-protein ligase UBR4                            | 2,52      | 0,0004  | 2,97       | 0,0029  |            |         |
| HABP2                                                     | Q14520 | Hyaluronan-binding protein 2                                | 2,51      | 0,0002  | 3,84       | 0,0003  |            |         |
| RAP2B/A                                                   | P61225 | Ras-related protein Rap-2b/a                                | 2,46      | 0,0051  |            |         | 2,05       | 0,0095  |
| ACIN1                                                     | Q9UKV3 | Apoptotic chromatin condensation inducer in the nucleus     | 2,44      | 0,0054  | 2,40       | 0,0076  |            |         |
| WDR43                                                     | Q15061 | WD repeat-containing protein 43                             | 2,29      | 0,0010  | 2,10       | 0,0018  |            |         |
| LAMB3                                                     | Q13751 | Laminin subunit beta-3                                      | 2,18      | 0,0002  | 3,59       | 0,0001  |            |         |
| ATAD1                                                     | Q8NBU5 | ATPase family AAA domain-containing protein 1               | 2,07      | 0,0031  | 3,31       | 0,0081  |            |         |
| FTH1                                                      | P02794 | Ferritin heavy chain                                        | 2,04      | 0,0038  |            |         | 2,28       | 0,0028  |
| IVL                                                       | P07476 | Involucrin                                                  | 0,50      | 0,0029  | 0,48       | 0,0088  |            |         |
| CD109                                                     | Q6YHK3 | CD109 antigen                                               | 0,47      | 0,0013  | 0,43       | 0,0081  |            |         |
| ZZEF1                                                     | O43149 | Zinc finger ZZ-type and EF-hand domain-containing protein 1 | 0,44      | 0,0005  | 0,42       | 0,0053  |            |         |
| PKP1                                                      | Q13835 | Plakophilin-1                                               | 0,38      | 0,0004  | 0,37       | 0,0005  |            |         |
| ISYNA1                                                    | Q9NPH2 | Inositol-3-phosphate synthase 1                             | 0,26      | 0,0035  | 0,19       | 0,0069  |            |         |
| PTK7                                                      | Q13308 | Inactive tyrosine-protein kinase 7                          | 0,25      | 0,0029  | 0,20       | 0,0084  |            |         |
| ABHD14B                                                   | Q96IU4 | Alpha/beta hydrolase domain-containing protein 14B          | 0,24      | 0,0061  | 0,24       | 0,0056  |            |         |
| REPS1                                                     | Q96D71 | RalBP1-associated Eps domain-containing protein 1           | 0,24      | 0,0000  | 0,23       | 0,0000  |            |         |
| ENDOG                                                     | Q14249 | Endonuclease G, mitochondrial                               | 0,10      | 0,0000  | 0,08       | 0,0037  |            |         |
| CASP1                                                     | P29466 | Caspase-1;Caspase-1 subunit p20;Caspase-1 subunit p10       | 0,09      | 0,0000  | 0,14       | 0,0045  |            |         |
| KRT2                                                      | P35908 | Keratin, type II cytoskeletal 2 epidermal                   |           |         | 3,79       | 0,0002  | 2,71       | 0,0046  |
| <b>Up and down-regulated in only one plasma treatment</b> |        |                                                             |           |         |            |         |            |         |
| HDAC7                                                     | Q8WUI4 | Histone deacetylase 7                                       | 61,34     | 0,0084  |            |         |            |         |
| NUP214                                                    | P35658 | Nuclear pore complex protein Nup214                         | 7,26      | 0,0041  |            |         |            |         |
| DNTTIP2                                                   | Q5QJE6 | Deoxynucleotidyltransferase terminal-interacting protein 2  | 5,05      | 0,0062  |            |         |            |         |
| INCENP                                                    | Q9NQS7 | Inner centromere protein                                    | 4,91      | 0,0074  |            |         |            |         |
| HECTD1                                                    | Q9ULT8 | E3 ubiquitin-protein ligase HECTD1                          | 4,84      | 0,0053  |            |         |            |         |
| PLEK                                                      | P08567 | Pleckstrin                                                  | 4,70      | 0,0061  |            |         |            |         |
| RIF1                                                      | Q5UIP0 | Telomere-associated protein RIF1                            | 4,69      | 0,0018  |            |         |            |         |
| SCAF11                                                    | Q99590 | Protein SCAF11                                              | 4,68      | 0,0065  |            |         |            |         |
| LYN                                                       | P07948 | Tyrosine-protein kinase Lyn                                 | 4,57      | 0,0006  |            |         |            |         |
| PRPF4B                                                    | Q13523 | Serine/threonine-protein kinase PRP4 homolog                | 3,14      | 0,0002  |            |         |            |         |
| PPM1A                                                     | P35813 | Protein phosphatase 1A                                      | 3,13      | 0,0060  |            |         |            |         |
| CDK7                                                      | P50613 | Cyclin-dependent kinase 7                                   | 3,06      | 0,0001  |            |         |            |         |
| DLGAP4                                                    | Q9Y2H0 | Disks large-associated protein 4                            | 2,85      | 0,0002  |            |         |            |         |
| TMEM109                                                   | Q9BVC6 | Transmembrane protein 109                                   | 2,71      | 0,0013  |            |         |            |         |
| APOBEC3B                                                  | Q9UH17 | DNA dC->dU-editing enzyme APOBEC-3B                         | 2,69      | 0,0005  |            |         |            |         |
| STX3                                                      | Q13277 | Syntaxin-3                                                  | 2,58      | 0,0004  |            |         |            |         |
| POLR1A                                                    | Q95602 | DNA-directed RNA polymerase I subunit RPA1                  | 2,43      | 0,0054  |            |         |            |         |
| APLP2                                                     | Q06481 | Amyloid-like protein 2                                      | 2,15      | 0,0057  |            |         |            |         |

|           |        |                                                                     |      |        |       |             |
|-----------|--------|---------------------------------------------------------------------|------|--------|-------|-------------|
| TNPO2     | O14787 | Transportin-2                                                       | 2,08 | 0,0038 |       |             |
| GDAP1     | Q8TB36 | Ganglioside-induced differentiation-associated protein 1            | 2,01 | 0,0058 |       |             |
| RRP1      | P56182 | Ribosomal RNA processing protein 1 homolog A                        | 2,00 | 0,0081 |       |             |
| IFIT1     | P09914 | Interferon-induced protein with tetratricopeptide repeats 1         | 0,48 | 0,0007 |       |             |
| EFNB1     | P98172 | Ephrin-B1                                                           | 0,37 | 0,0001 |       |             |
| MX1       | P20591 | Interferon-induced GTP-binding protein Mx1                          | 0,36 | 0,0002 |       |             |
| IDH2      | P48735 | Isocitrate dehydrogenase [NADP], mitochondrial                      | 0,35 | 0,0093 |       |             |
| ID1       | P41134 | DNA-binding protein inhibitor ID-1                                  | 0,34 | 0,0098 |       |             |
| ARFIP1    | P53367 | Arfaptin-1                                                          | 0,28 | 0,0022 |       |             |
| TRIM21    | P19474 | E3 ubiquitin-protein ligase TRIM21                                  | 0,27 | 0,0086 |       |             |
| DHRS1     | Q96LJ7 | Dehydrogenase/reductase SDR family member 1                         | 0,12 | 0,0009 |       |             |
| C8B       | P07358 | Complement component C8 beta chain                                  |      |        | 12,47 | 0,0003      |
| IGF2R     | P11717 | Cation-independent mannose-6-phosphate receptor                     |      |        | 9,25  | 0,0003      |
| QIL1      | Q5XKP0 | Protein QIL1                                                        |      |        | 6,49  | 0,0030      |
| LHFPL2    | Q6ZUX7 | Lipoma HMGIC fusion partner-like 2 protein                          |      |        | 5,06  | 0,0010      |
| DCTD      | P32321 | Deoxycytidylate deaminase                                           |      |        | 4,92  | 0,0003      |
| VTN       | P04004 | Vitronectin                                                         |      |        | 4,78  | 0,0003      |
| PRPF8     | Q6P2Q9 | Pre-mRNA-processing-splicing factor 8                               |      |        | 4,44  | 0,0097      |
| APOM      | Q95445 | Apolipoprotein M                                                    |      |        | 3,70  | 0,0001      |
| EHD3      | Q9NZN3 | EH domain-containing protein 3                                      |      |        | 3,65  | 0,0049      |
| POLR1B    | Q9H9Y6 | DNA-directed RNA polymerase I subunit RPA2                          |      |        | 3,61  | 0,0092      |
| CEP164    | Q9UPV0 | Centrosomal protein of 164 kDa                                      |      |        | 3,60  | 0,0000      |
| ZC3H4     | Q9UPT8 | Zinc finger CCCH domain-containing protein 4                        |      |        | 3,47  | 0,0025      |
| RRAGA/B   | Q7L523 | Ras-related GTP-binding protein A/B                                 |      |        | 3,20  | 0,0056      |
| RNF19B/A  | Q6ZMZ0 | E3 ubiquitin-protein ligase RNF19B/A                                |      |        | 3,13  | 0,0018      |
| APOB      | P04114 | Apolipoprotein B-100;Apolipoprotein B-48                            |      |        | 2,78  | 0,0065      |
| SYNE2     | Q8WXH0 | Nesprin-2                                                           |      |        | 2,67  | 0,0022      |
| APP       | P05067 | Amyloid beta A4 protein                                             |      |        | 2,67  | 0,0092      |
| LAMA3     | Q16787 | Laminin subunit alpha-3                                             |      |        | 2,66  | 0,0000      |
| LAMC2     | Q13753 | Laminin subunit gamma-2                                             |      |        | 2,65  | 0,0007      |
| FTSJ3     | Q8IY81 | pre-rRNA processing protein FTSJ3                                   |      |        | 2,47  | 0,0011      |
| THBS1     | P07996 | Thrombospondin-1                                                    |      |        | 2,30  | 0,0008      |
| QRICH1    | Q2TAL8 | Glutamine-rich protein 1                                            |      |        | 2,26  | 0,0058      |
| CD44      | P16070 | CD44 antigen                                                        |      |        | 2,26  | 0,0081      |
| TIMM21    | Q9BVV7 | Mitochondrial import inner membrane translocase subunit Tim21       |      |        | 2,21  | 0,0059      |
| MTHFD2    | P13995 | Bifunctional methylenetetrahydrofolate dehydrogenase/cyclohydrolase |      |        | 2,09  | 0,0073      |
| ZFP36L1   | Q07352 | Zinc finger protein 36                                              |      |        | 2,08  | 0,0055      |
| SRP72     | O76094 | Signal recognition particle subunit SRP72                           |      |        | 0,50  | 0,0008      |
| PBXIP1    | Q96AQ6 | Pre-B-cell leukemia transcription factor-interacting protein 1      |      |        | 0,49  | 0,0013      |
| HMGN1     | P05114 | Non-histone chromosomal protein HMG-14                              |      |        | 0,49  | 0,0002      |
| OAS3      | Q9Y6K5 | 2-5-oligoadenylate synthase 3                                       |      |        | 0,48  | 0,0052      |
| SERPINB13 | Q9UIV8 | Serpin B13                                                          |      |        | 0,48  | 0,0006      |
| STK39     | Q9UEW8 | STE20/SPS1-related proline-alanine-rich protein kinase              |      |        | 0,47  | 0,0021      |
| FBP1      | P09467 | Fructose-1,6-bisphosphatase 1                                       |      |        | 0,47  | 0,0006      |
| DHX36     | Q9H2U1 | Probable ATP-dependent RNA helicase DHX36                           |      |        | 0,47  | 0,0029      |
| LYPLA2    | O95372 | Acyl-protein thioesterase 2                                         |      |        | 0,46  | 0,0047      |
| PYCARD    | Q9ULZ3 | Apoptosis-associated speck-like protein containing a CARD           |      |        | 0,46  | 0,0004      |
| LCLAT1    | Q6UWP7 | Lysocardiolipin acyltransferase 1                                   |      |        | 0,45  | 0,0004      |
| RABL6     | Q3YEC7 | Rab-like protein 6                                                  |      |        | 0,45  | 0,0036      |
| ETHE1     | O95571 | Persulfide dioxygenase ETHE1, mitochondrial                         |      |        | 0,44  | 0,0029      |
| NAPRT1    | Q6XQN6 | Nicotinate phosphoribosyltransferase                                |      |        | 0,44  | 0,0083      |
| ASS1      | P00966 | Argininosuccinate synthase                                          |      |        | 0,43  | 0,0003      |
| AP2A2     | O94973 | AP-2 complex subunit alpha-2                                        |      |        | 0,41  | 0,0022      |
| SRP19     | P09132 | Signal recognition particle 19 kDa protein                          |      |        | 0,41  | 0,0021      |
| NT5DC1    | Q5TFE4 | 5-nucleotidase domain-containing protein 1                          |      |        | 0,41  | 0,0052      |
| HLA-DRA   | P01903 | HLA class II histocompatibility antigen, DR alpha chain             |      |        | 0,40  | 0,0051      |
| NT5C2     | P49902 | Cytosolic purine 5-nucleotidase                                     |      |        | 0,40  | 0,0001      |
| LRRC1     | Q9BTT6 | Leucine-rich repeat-containing protein 1                            |      |        | 0,40  | 0,0049      |
| LRSAM1    | Q6UWE0 | E3 ubiquitin-protein ligase LRSAM1                                  |      |        | 0,38  | 0,0058      |
| ASUN      | Q9NVM9 | Protein asunder homolog                                             |      |        | 0,31  | 0,0023      |
| SERPINB3  | P29508 | Serpin B3                                                           |      |        | 0,29  | 0,0000      |
| POLR2G    | P62487 | DNA-directed RNA polymerase II subunit RPB7                         |      |        | 0,29  | 0,0051      |
| HERC4     | Q5GLZ8 | Probable E3 ubiquitin-protein ligase HERC4                          |      |        | 0,27  | 0,0049      |
| MAP2K4    | P45985 | Dual specificity mitogen-activated protein kinase kinase 4          |      |        | 0,26  | 0,0032      |
| FANCD2    | Q9BXW9 | Fanconi anemia group D2 protein                                     |      |        | 0,26  | 0,0066      |
| CCNB2     | O95067 | G2/mitotic-specific cyclin-B2                                       |      |        | 0,25  | 0,0100      |
| DDX58     | O95786 | Probable ATP-dependent RNA helicase DDX58                           |      |        | 0,21  | 0,0067      |
| UFC1      | Q9Y3C8 | Ubiquitin-fold modifier-conjugating enzyme 1                        |      |        | 0,21  | 0,0007      |
| PDCD4     | Q53EL6 | Programmed cell death protein 4                                     |      |        | 0,19  | 0,0054      |
| ABCB6     | Q9NP58 | ATP-binding cassette sub-family B member 6, mitochondrial           |      |        | 0,19  | 0,0004      |
| AAR2      | Q9Y312 | Protein AAR2 homolog                                                |      |        | 0,10  | 0,0062      |
| NUCKS1    | Q9H1E3 | Nuclear ubiquitous casein and cyclin-dependent kinase substrate 1   |      |        | 0,07  | 0,0000      |
| GAK       | O14976 | Cyclin-G-associated kinase                                          |      |        |       | 9,54 0,0004 |
| RANBP3    | Q9H6Z4 | Ran-binding protein 3                                               |      |        |       | 6,18 0,0086 |
| ZRANB2    | Q95218 | Zinc finger Ran-binding domain-containing protein 2                 |      |        |       | 4,23 0,0039 |
| DPF2      | Q92785 | Zinc finger protein ubi-d4                                          |      |        |       | 3,72 0,0007 |
| BRD4      | O60885 | Bromodomain-containing protein 4                                    |      |        |       | 3,16 0,0018 |
| THADA     | Q6YHU6 | Thyroid adenoma-associated protein                                  |      |        |       | 2,47 0,0094 |
| HTRA2     | O43464 | Serine protease HTRA2, mitochondrial                                |      |        |       | 2,36 0,0018 |
| DCTN4     | Q9UJW0 | Dynactin subunit 4                                                  |      |        |       | 2,31 0,0013 |
| ATP2B1/3  | P20020 | Plasma membrane calcium-transporting ATPase 1/3                     |      |        |       | 2,17 0,0037 |
| CDYL      | Q9Y232 | Chromodomain Y-like protein                                         |      |        |       | 2,08 0,0008 |
| MYBBP1A   | Q9BQG0 | Myb-binding protein 1A                                              |      |        |       | 0,46 0,0040 |
| ODR4      | Q5SWX8 | Protein odr-4 homolog                                               |      |        |       | 0,34 0,0098 |
| MPHOSPH8  | Q99549 | M-phase phosphoprotein 8                                            |      |        |       | 0,32 0,0026 |
| C1orf174  | Q8IYL3 | UPF0688 protein C1orf174                                            |      |        |       | 0,29 0,0006 |
| PPIC      | P45877 | Peptidyl-prolyl cis-trans isomerase C                               |      |        |       | 0,20 0,0000 |
| HLA-C     | Q07000 | HLA class I histocompatibility antigen, Cw-15 alpha chain           |      |        |       | 0,16 0,0000 |



**Table S2. List of proteins affected by the plasma activated treatments in HaCaT cells comparison to control cells**

| <b>Gene names</b>              | <b>Protein names</b>                                         | <b>Acc n°</b> | <b>Ratio He/C</b> | <b>t-test</b> |
|--------------------------------|--------------------------------------------------------------|---------------|-------------------|---------------|
| <b>Up-regulated proteins</b>   |                                                              |               |                   |               |
| <b>Q16763</b>                  | Ubiquitin-conjugating enzyme E2 S                            | Q5JTZ9        | 34,37             | 0,0000        |
| <b>Q4G0Z9</b>                  | MCM domain-containing protein 2                              | Q14839        | 23,31             | 0,0007        |
| <b>P42357</b>                  | Histidine ammonia-lyase                                      | Q9Y244        | 20,19             | 0,0000        |
| <b>Q96CM8</b>                  | Acyl-CoA synthetase family member 2, mitochondrial           | Q12888        | 9,88              | 0,0000        |
| <b>Q8IZP0</b>                  | Abl interactor 1                                             | P46013        | 8,46              | 0,0045        |
| <b>Q96EM0</b>                  | Trans-L-3-hydroxyproline dehydratase                         | P00742        | 7,24              | 0,0056        |
| <b>O14656</b>                  | Torsin-1A                                                    | P13671        | 2,56              | 0,0025        |
| <b>Q16787</b>                  | Laminin subunit alpha-3                                      | O75369        | 2,17              | 0,0089        |
| <b>Q96JB1</b>                  | Dynein heavy chain 8, axonemal                               | P12270        | 2,16              | 0,0053        |
| <b>P30307</b>                  | M-phase inducer phosphatase 3                                | Q7KZ85        | 2,16              | 0,0083        |
| <b>Down-regulated proteins</b> |                                                              |               |                   |               |
| <b>P52292</b>                  | Importin subunit alpha-1                                     | KPNA2         | 0,48              | 0,0016        |
| <b>P20340</b>                  | Ras-related protein Rab-6A                                   | RAB6A         | 0,47              | 0,0000        |
| <b>Q5K651</b>                  | Sterile alpha motif domain-containing protein 9              | SAMD9         | 0,43              | 0,0029        |
| <b>O75449</b>                  | Katanin p60 ATPase-containing subunit A1                     | KATNA1        | 0,43              | 0,0014        |
| <b>P50281</b>                  | Matrix metalloproteinase-14                                  | MMP14         | 0,43              | 0,0044        |
| <b>P49768</b>                  | Presenilin-1                                                 | PSEN1         | 0,41              | 0,0062        |
| <b>Q9BPZ7</b>                  | Target of rapamycin complex 2 subunit MAPKAP1                | MAPKAP1       | 0,37              | 0,0020        |
| <b>Q9NQW6</b>                  | Actin-binding protein anillin                                | ANLN          | 0,37              | 0,0053        |
| <b>Q7Z412</b>                  | Peroxisome assembly protein 26                               | PEX26         | 0,34              | 0,0095        |
| <b>Q6UXN9</b>                  | WD repeat-containing protein 82                              | WDR82         | 0,33              | 0,0020        |
| <b>Q13835</b>                  | Plakophilin-1                                                | PKP1          | 0,32              | 0,0057        |
| <b>Q9NUQ3</b>                  | Gamma-taxilin                                                | TXLNG         | 0,31              | 0,0010        |
| <b>P43003</b>                  | Excitatory amino acid transporter 1                          | SLC1A3        | 0,25              | 0,0067        |
| <b>O95155</b>                  | Ubiquitin conjugation factor E4 B                            | UBE4B         | 0,23              | 0,0000        |
| <b>Q9H4H8</b>                  | Protein FAM83D                                               | FAM83D        | 0,22              | 0,0072        |
| <b>Q53EL6</b>                  | Programmed cell death protein 4                              | PDCD4         | 0,21              | 0,0010        |
| <b>Q6NXE6</b>                  | Armadillo repeat-containing protein 6                        | ARMC6         | 0,20              | 0,0036        |
| <b>Q96TA2</b>                  | ATP-dependent zinc metalloprotease YME1L1                    | YME1L1        | 0,18              | 0,0075        |
| <b>Q4J6C6</b>                  | Prolyl endopeptidase-like                                    | PREPL         | 0,14              | 0,0019        |
| <b>P40937</b>                  | Replication factor C subunit 5                               | RFC5          | 0,13              | 0,0007        |
| <b>Q07000</b>                  | HLA class I histocompatibility antigen                       | HLA-C         | 0,11              | 0,0033        |
| <b>I1YAP6</b>                  | Tripartite motif-containing protein 77                       | TRIM77        | 0,11              | 0,0004        |
| <b>Q96KB5</b>                  | Lymphokine-activated killer T-cell-originated protein kinase | PBK           | 0,09              | 0,0000        |
| <b>P42695</b>                  | Condensin-2 complex subunit D3                               | NCAPD3        | 0,02              | 0,0036        |
| <b>Q9BUP3</b>                  | Oxidoreductase HTATIP2                                       | HTATIP2       | 0,01              | 0,0002        |
